# Supplementary material for: Covalent binding of Si nanoparticles to graphene sheets and its influence on lithium storage properties of Si negative electrode
Source: Royal Society of Chemistry journal article supplement (doi:10.1039/c2jm15232k), 2012-01-01
Supplement: c2jm15232k.pdf [file c2jm15232k.pdf]

### Supplementary information

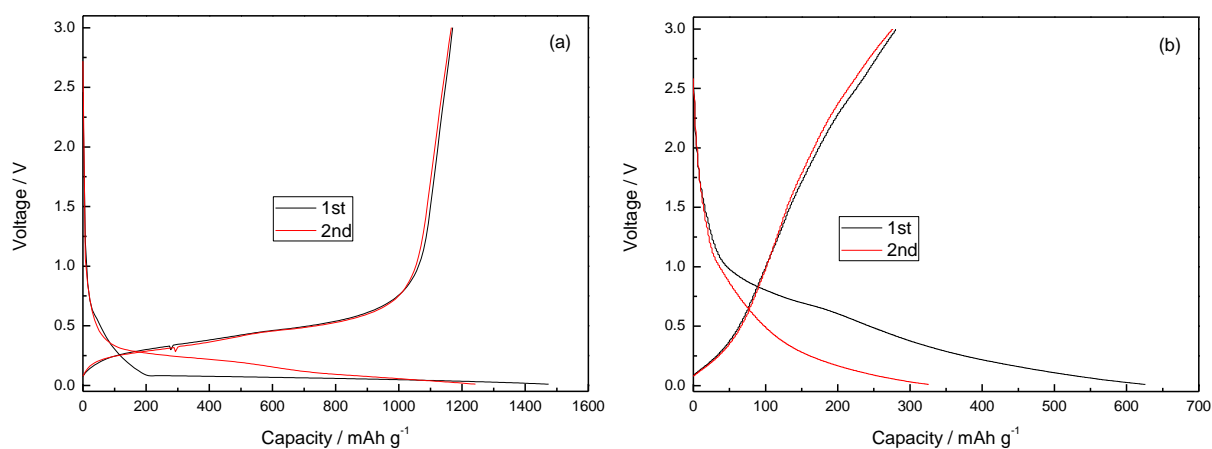

Figure S1. Voltage profiles of the pristine Si (a) and pure graphene (b) electrodes at a current density of 300 mA

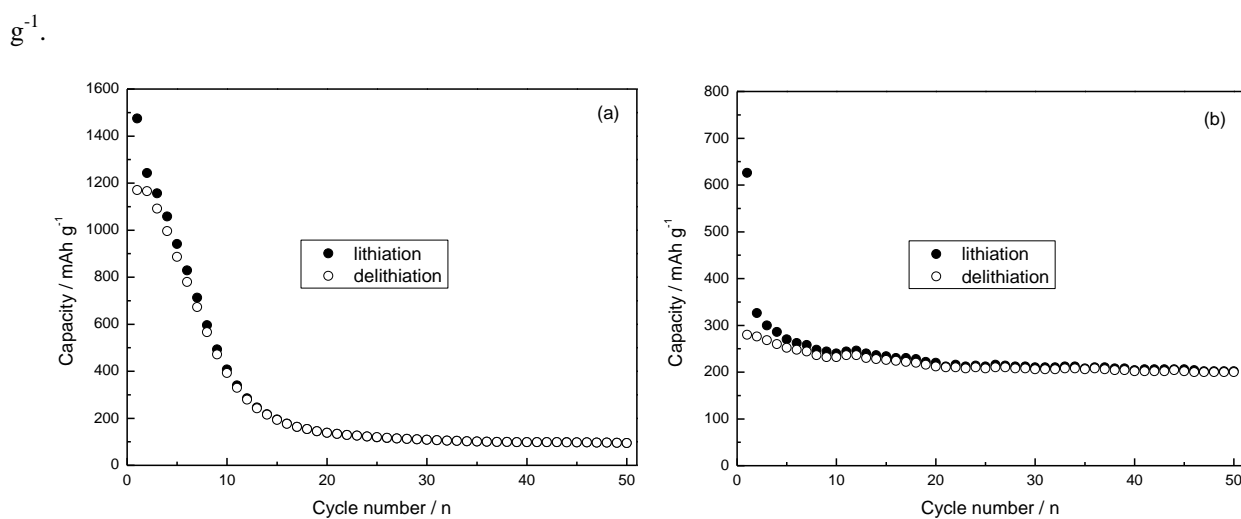

Figure S2. Cycling performance of the pristine Si (a) and pure graphene (b) electrodes at a current density of 300 mA g<sup>-1</sup>.
